# Supplementary material
Source: publisher figshare collection journal article supplement (https://frontiersin.figshare.com/ndownloader/files/32158997)
Supplement: Supplementary file [file 32158997]

## *Supplementary Material*

# **RNA Hydrogel combined with MnO<sub>2</sub> Nanoparticles as a Nano-vaccine to Treat Triple Negative Breast Cancer**

**Weicai Wang<sup>1</sup>, Xiaofan Liu<sup>1</sup>, Lairong Ding<sup>1</sup>, Hyung Jong Jin<sup>2</sup> and Xuemei Li<sup>1\*</sup>**

<sup>1</sup> Collaborative Innovation Center of Tumor Marker Detection Technology, Equipment and Diagnosis-Therapy Integration in Universities of Shandong, Shandong Province Key Laboratory of Detection Technology for Tumor Markers, School of Chemistry and Chemical Engineering, Linyi University, Linyi, China

<sup>2</sup> Department of Bioscience and Biotechnology, the University of Suwon, Hwaseong City, Gyeonggi-Do, Republic of Korea

**\*Correspondence:** xuemei\_li@yeah.net

**Supplementary Table S1.** DNA sequence used in this work

| No.                             | Sequence                                                                                                                                                                                                                                                                                                                                                                                                                                                                                                                         |
|---------------------------------|----------------------------------------------------------------------------------------------------------------------------------------------------------------------------------------------------------------------------------------------------------------------------------------------------------------------------------------------------------------------------------------------------------------------------------------------------------------------------------------------------------------------------------|
| ssDNA                           | 5'-phosphate- <b>ATAGTGAGTCGTATTA</b> <b>AAA</b> <b>AA</b> <b>AAA</b> <b>CCG</b> <b>TTA</b> <b>CCA</b> <b>TCT</b><br><b>TGA</b> <b>GTG</b> <b>TGA</b> <b>C</b> <b>CA</b> <b>CTC</b> <b>CAT</b> <b>TGT</b> <b>CCT</b> <b>AGG</b> <b>C</b> <b>CA</b> <b>CCA</b> <b>AGA</b> <b>TCT</b> <b>GAA</b><br><b>CGG</b> <b>TTG</b> <b>AAAAA</b> <b>AAG</b> <b>TCA</b> <b>CCT</b> <b>CAC</b> <b>TTC</b> <b>GAA</b> <b>CAG</b> <b>GAA</b> <b>GTA</b> <b>AGG</b> <b>TGG</b><br><b>CCT</b> <b>CAG</b> <b>ACG</b> <b>AA</b> <b>AAAATCCCT</b> -3' |
| ssDNA for<br>scrambled<br>shRNA | 5'-phosphate- <b>ATAGTGAGTCGTATTA</b> <b>AAAAA</b> <b>GGA</b> <b>CAA</b> <b>CTGCCA</b> <b>TCG</b><br><b>CCG</b> <b>TCA</b> <b>CTG</b> <b>ATA</b> <b>TTT</b> <b>CAT</b> <b>GAT</b> <b>TCT</b> <b>ACT</b> <b>AGG</b> <b>GAT</b> <b>TCC</b> <b>GCC</b> <b>ACA</b><br><b>GGA</b> <b>CATA</b> <b>AAAAA</b> <b>GCT</b> <b>GAG</b> <b>GAA</b> <b>AGT</b> <b>CCA</b> <b>GTG</b> <b>AAC</b> <b>GAA</b> <b>CAT</b> <b>ACC</b> <b>CTA</b><br><b>GCG</b> <b>TGA</b> <b>CCT</b> <b>AAAAA</b> <b>ATCCCT</b> -3'                                |
| CpG                             | 5'- <b>FAM</b> - <b>AAA</b> <b>ATCCC</b> <b>TATAG</b> <b>TGAGT</b> <b>CGTAT</b> <b>TA</b> <b>AAA</b> <b>TCC</b> <b>ATG</b> <b>ACG</b> <b>TTC</b><br><b>CTG</b> <b>ACG</b> <b>TT</b> --- <b>Chol</b> -3'                                                                                                                                                                                                                                                                                                                          |
| T7 promotor                     | 5'- <b>TAA</b> <b>TAC</b> <b>GAC</b> <b>TCA</b> <b>CTA</b> <b>TAG</b> <b>GGA</b> <b>T</b> -3'                                                                                                                                                                                                                                                                                                                                                                                                                                    |
| F-C-LXL apt                     | 5'- <b>FAM</b> - <b>CAC</b> <b>TCC</b> <b>ATT</b> <b>GTC</b> <b>CTA</b> <b>GGC</b> <b>GAA</b> <b>TTC</b> <b>AGT</b> <b>CGG</b> <b>ACA</b> <b>GCG</b><br><b>AAG</b> <b>TAG</b> <b>TTT</b> <b>TCC</b> <b>TTC</b> <b>TAA</b> <b>CCT</b> <b>AAG</b> <b>AAC</b> <b>CCG</b> <b>CGG</b> <b>CAG</b> <b>TTT</b> <b>AAT</b> <b>GTA</b><br><b>GAT</b> <b>GGA</b> <b>CGA</b> <b>A</b> - <b>Chol</b> -3'                                                                                                                                      |

The ssDNA sequence marked in red will bind to T7 promotor sequence. Bold blue sequence in ssDNA is shRNA-182 sequence, which will bind to the blue one in Fam-Circle of shmiR-182 steam loop-LXL apt to modify an aptamer of MDA-MB-231 cells. The random sequence marked in green is the site for Dicer. The sequence marked in brown is shRNA-205 sequence. The part of CpG sequence which are circled in gay will bind to the part of ssDNA sequence circled in gay.

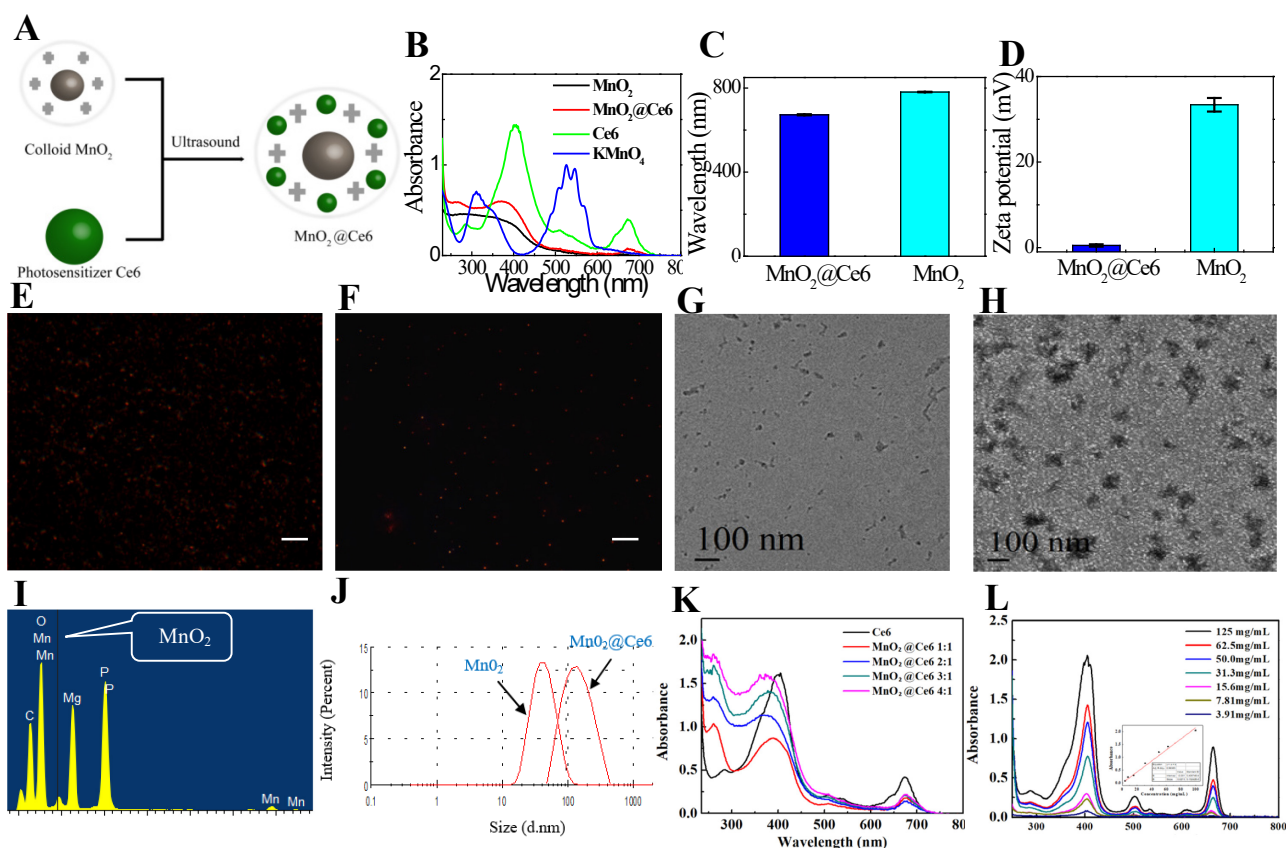

**Supplementary Figure S1.** Synthesis and characterize of  $\text{MnO}_2@\text{Ce6}$  and  $\text{MnO}_2$ . (A) Illustration of the synthesis of  $\text{MnO}_2@\text{Ce6}$  nanoparticles. (B) UV-vis spectra of  $\text{Ce6}$ ,  $\text{KMnO}_4$ ,  $\text{MnO}_2$ , and  $\text{MnO}_2@\text{Ce6}$  nanoparticles. (C) Scattering spectrometer of  $\text{MnO}_2@\text{Ce6}$  and  $\text{MnO}_2$ . Their maximum scattering peaks of  $\text{MnO}_2@\text{Ce6}$  and  $\text{MnO}_2$  were different. (D) Zeta potential of  $\text{MnO}_2@\text{Ce6}$  and  $\text{MnO}_2$ . (E, F) Dark-field microscopy of  $\text{MnO}_2@\text{Ce6}$  and  $\text{MnO}_2$  (scale bars are 20  $\mu\text{m}$ ). (G, H) TEM of  $\text{MnO}_2@\text{Ce6}$  and  $\text{MnO}_2$ . (I) EDS elemental analysis of  $\text{MnO}_2@\text{Ce6}$ . (J) The size of  $\text{MnO}_2@\text{Ce6}$  and  $\text{MnO}_2$ . (K) The supernatant of 20  $\mu\text{L}$ , 40  $\mu\text{L}$ , 60  $\mu\text{L}$ , and 80  $\mu\text{L}$  colloidal  $\text{MnO}_2$  was added into 20  $\mu\text{L}$  of activated  $\text{Ce6}$  (10 mg/mL) with ultrasonication for 4 h and the UV-vis spectrum was obtained. When  $\text{MnO}_2:\text{Ce6}$  was 4:1, the  $\text{MnO}_2@\text{Ce6}$  was stable in DI water. (L) The linear equation of different concentrations of  $\text{Ce6}$  is  $y = 0.025x - 0.001$  and the loading rate of  $\text{Ce6}$  in  $\text{MnO}_2$  is around 66.4 mg/mL.

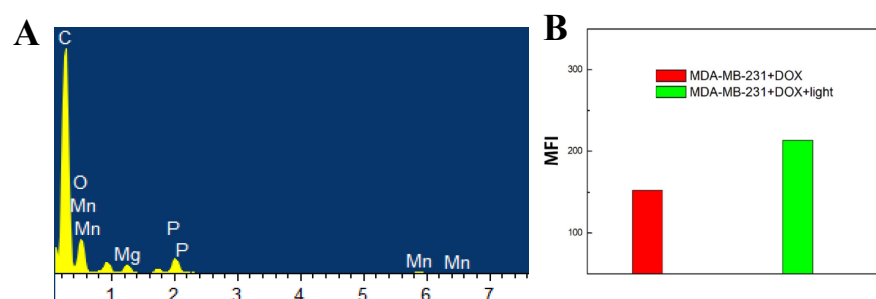

**Supplementary Figure S2.** (A)EDS elemental analysis of HMC. (B)Mean fluorescence intensity (MFI) analysis of DOX in Figure 3c.

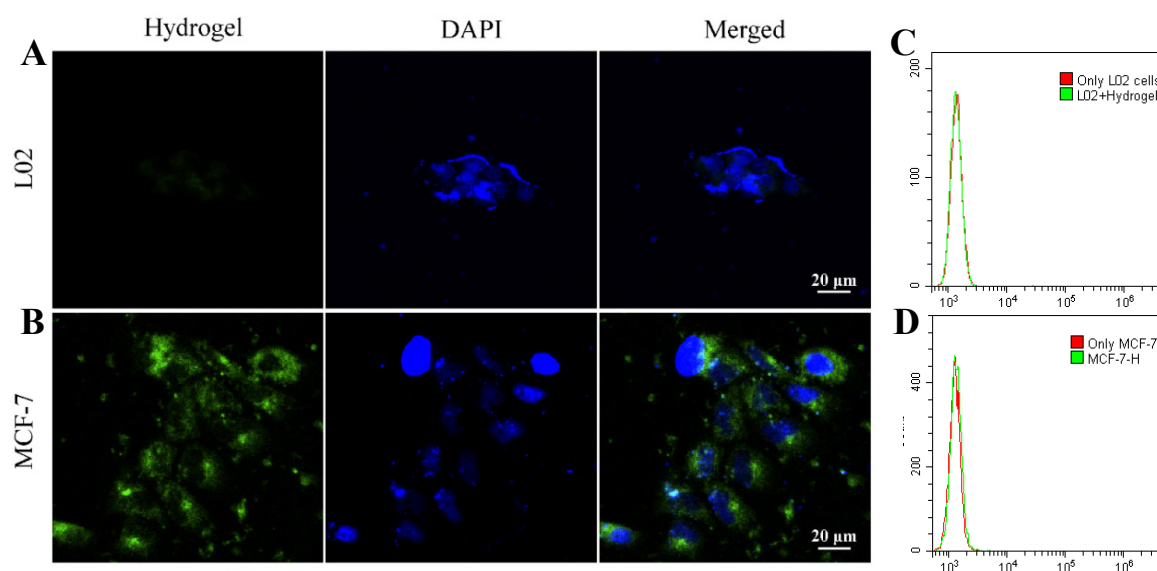

**Supplementary Figure S3.** The confocal microscopic images of untargeted cell group such as (A) L02 cells and (B) MCF-7 cells internalizing FAM-labeled Hydrogel (scale bars are 20 μm). Green and blue signals indicate FAM-labeled Hydrogel and DAPI dyes, respectively. Based on Flow cytometry (C, D), the intensity of fluorescent signals in cells was detected.

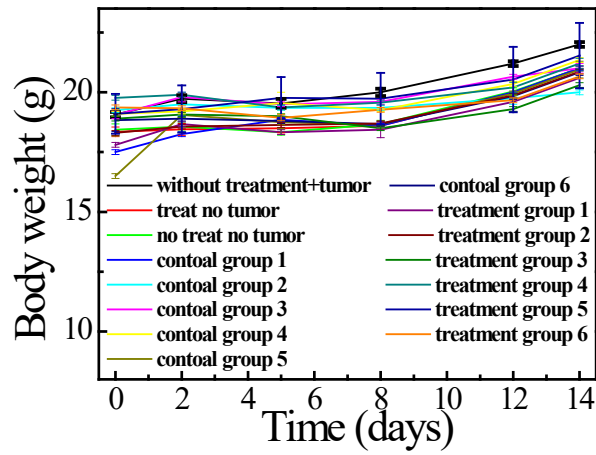

**Supplementary Figure S4.** Average body weights of Balb/C mice during various treatments. Error bars were calculated from the standard errors of the mean (n =3).

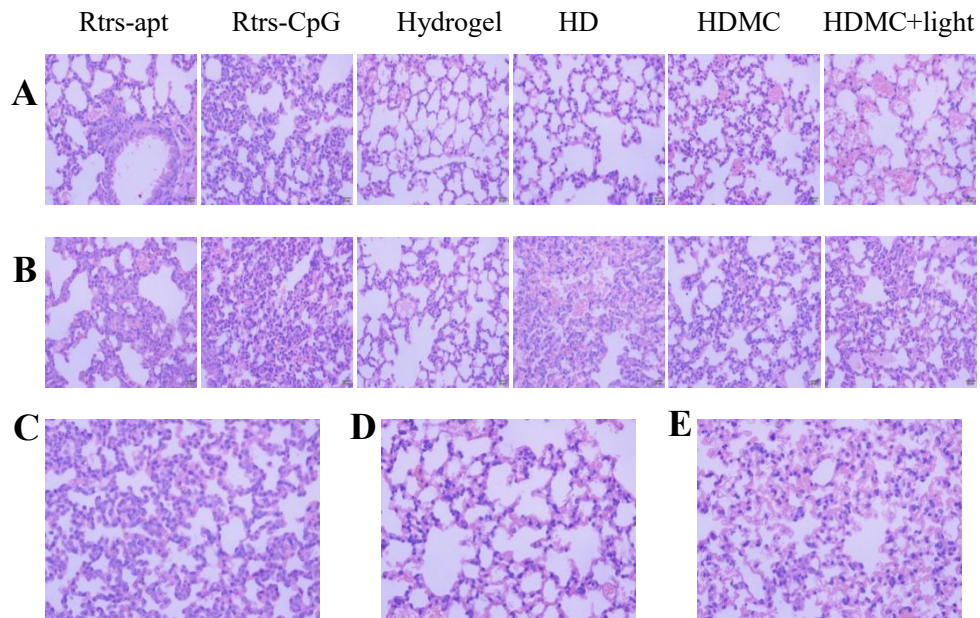

**Supplementary Figure S5.** The lungs of these Balb/C mice after various treatments. (A) The treatment group; (B) The control group; (C) With tumor but no treatment; (D) No tumor but with treatment; (E) Normal mice. Scale bars are 20  $\mu$ m.

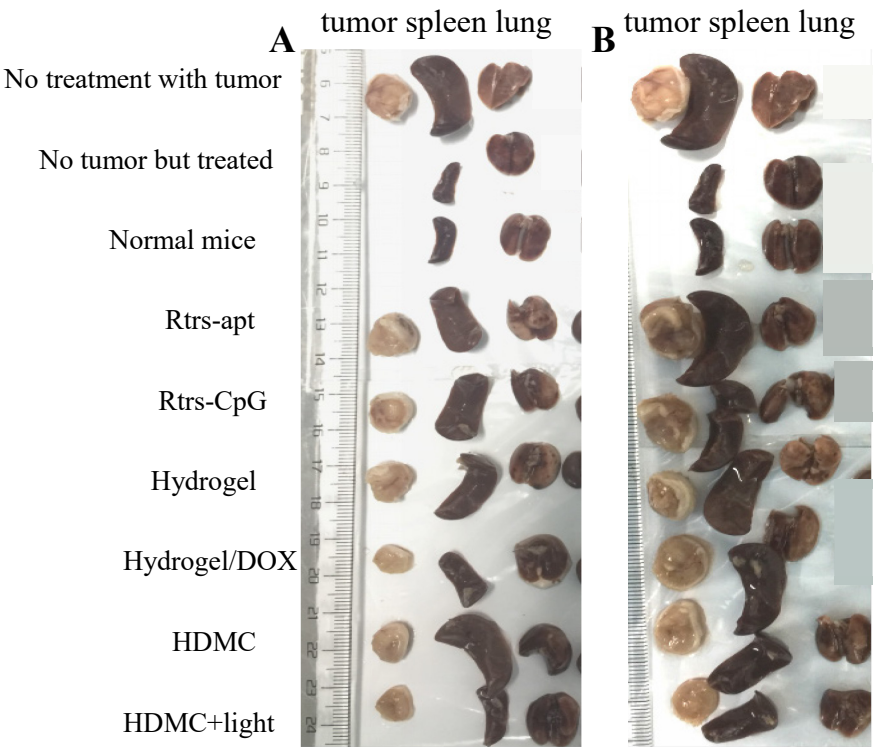

**Supplementary Figure S6.** Ex vivo images of tumors, spleens, and lungs depicted in treated mice. (A) Treatment group; (B) Control group.
